# Supplementary material for: Transporter-Driven Engineering of a Genetic Biosensor for the Detection and Production of Short-Branched Chain Fatty Acids in Saccharomyces cerevisiae
Source: PubMed Central journal article supplement (PMC8975619; doi:10.3389/fbioe.2022.838732), 2022-03-18
Supplement: DataSheet1.pdf [file DataSheet1.pdf]

# Transporter-driven engineering of a genetic biosensor for the detection and production of short-branched chain fatty acids in *Saccharomyces cerevisiae*

Ryoma Miyake<sup>1,2,3,4</sup>, Hua Ling<sup>1,2,3</sup>, Jee Loon Foo<sup>1,2,3</sup>, Nobutake Fugono<sup>4</sup>, Matthew Wook Chang<sup>1,2,3\*</sup>

<sup>1</sup> NUS Synthetic Biology for Clinical and Technological Innovation (SynCTI), National University of Singapore, Singapore 117456, Singapore

<sup>2</sup> Synthetic Biology Translational Research Programme, Yong Loo Lin School of Medicine, National University of Singapore, Singapore 117456, Singapore

<sup>3</sup> Department of Biochemistry, Yong Loo Lin School of Medicine, National University of Singapore, Singapore 117597, Singapore

<sup>4</sup> Science & Innovation Center, Mitsubishi Chemical Corporation, Yokohama-shi, Kanagawa 227-8502, Japan

**\* Correspondence:**

Matthew Wook Chang, Tel: +65 6601 3687, E-mail: [bchcmw@nus.edu.sg](mailto:bchcmw@nus.edu.sg)

**Supplementary tables**
**Supplementary Table 1.** Sequences of primers used in this study

| <b>Name</b>         | <b>Sequence</b>                                                    | <b>Purposes</b>             |
|---------------------|--------------------------------------------------------------------|-----------------------------|
| PDR12p-f            | CGAAGAATTGTTAATTAAGAGCTGATATC<br>TTTGTTTTGCATTTTAC                 | pPDR12<br>amplification     |
| PDR12p-r            | GAATAATTCTTCACCTTTAGACATTTTTTTA<br>TTAATAAGAACAATAAC               |                             |
| yEGFP-f             | ATGTCTAAAGGTGAAGAATTATTC                                           | yEGFP gene<br>amplification |
| yEGFP-r             | GCCGCGGTACCAAGCTTACTCGAGTTATTT<br>GTACAATTCATCCATACCA              |                             |
| PDR12-Del-f         | GATTATGCTAATTCGGTACAATCCTACGCTG<br>CCTCCGAAGGCCTGAAGCTTCGTACGCTG   | PDR12 gene<br>deletion      |
| PDR12-Del-r         | ATCCCAAGAGTAGATGGAGGCATTCATTGCC<br>TGAGCTTCAACAGGCCACTAGTGGATCTG   |                             |
| PDR12-CheGD-F       | ATGTCTTCGACTGACGAACA                                               |                             |
| PDR12-CheGD-R       | CGTTCTAATGGCTTGGGCAA                                               |                             |
| PDR12-pTEF1-F       | CGTTAAGAGCCGATTCGCCGGAATTTCTCG<br>ATTTTTTTCCGTGCAGGTCGACAACCCTTA   | pPDR12<br>replacement       |
| PDR12-pTEF1-R       | CGACGAAATGTCTTTCTCAATATGTTTCGTCA<br>GTCGAAGACATTTTGTAATTA AAACTTAG |                             |
| TEF1p-UP-F          | AGGTGATATCAGATCCACTAGT                                             |                             |
| PDR12-<br>CheTEFp-r | GCATAATCATCGTCATGGTTCG                                             |                             |

**Supplementary Table 2.** Chemical and physical properties of carboxylic acids tested in this study

| <b>Carboxylic acids</b>    | <b>pKa</b> | <b>LogP</b> | <b>PubChem CID**</b> |
|----------------------------|------------|-------------|----------------------|
| Cinnamic acid              | 4.55*      | 2.13        | 444539               |
| Benzoic acid               | 4.19       | 1.87        | 243                  |
| Octanoic acid              | 4.89       | 3.05        | 379                  |
| Isovaleric acid            | 4.77       | 1.16        | 10430                |
| 2-methylbutyric acid       | 4.80*      | 1.18        | 8314                 |
| Isobutyric acid            | 4.84       | 0.94        | 6590                 |
| Methacrylic acid           | 4.65       | 0.93        | 4093                 |
| Propionic acid             | 4.88       | 0.33        | 1032                 |
| Acetic acid                | 4.76       | -0.17       | 176                  |
| Coumaric acid              | 4.58*      | 1.79        | 637542               |
| 4-hydroxy benzoic acid     | 4.54       | 1.58        | 135                  |
| 4-Hydroxyisovaleric acid   | 4.38*      | -0.35*      | 69362                |
| 4-Oxopentanoic acid        | 4.64       | -0.49       | 11579                |
| L-leucine                  | 2.36       | -1.52       | 6106                 |
| 4-methyl 2-oxovaleric acid | 2.65       | 0.9         | 70                   |

\* Calculated using Advanced Chemistry Development (ACD/Labs) Software V11.02.

\*\*Data sources are available at <https://pubchem.ncbi.nlm.nih.gov/>. pKa, acid dissociation constant, LogP, partition coefficient.

Supplementary Figures

Supplementary Figure 1

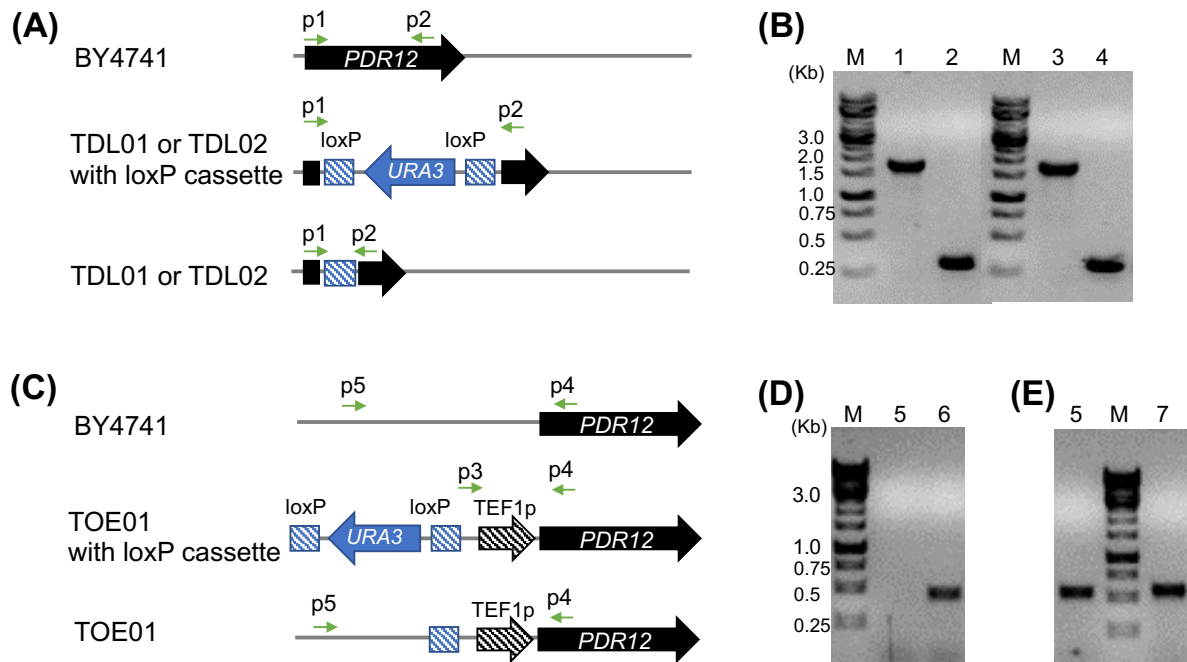

**Supplementary Figure 1.** Genetic modifications of *S. cerevisiae* strains. *PDR12* gene was deleted through homologous recombination and Cre-LoxP-based recovery to create TDL01 and TDL02 (A) which were confirmed by PCR amplification of target genomic DNA fragments using primer p1 and p2 (B). *PDR12* gene was over-expressed by replacing its native promoter with TEF1 promoter through homologous recombination and Cre-LoxP-based recovery to create TOE01 (C) confirmed by PCR amplification of target genomic DNA fragments using primer p3 and p4 (D) and using p4 and p5 (E). M, a DNA ladder with band sizes indicated, lane 1-4, TDL-01 before and after removing a loxP cassette, TDL-01 before and after *URA3* marker rescue, TDL02; lane 5-6, BY4741, TOE01 after *URA3* marker rescue.

Supplementary Figure 2

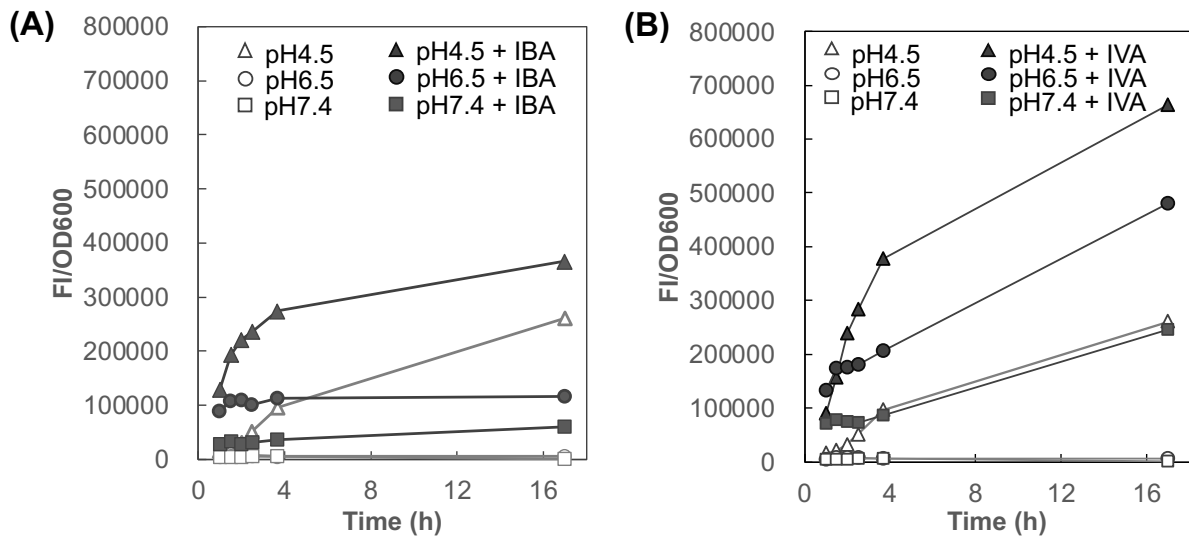

**Supplementary Figure 2.** Time-course fluorescence intensity of BY4741-S<sub>LCA</sub> in response to IBA (A) and IVA (B), respectively in unbuffered (at pH4.5) and buffered (at pH6.5 and pH7.4) SCD medium. BY4741-S<sub>LCA</sub> was cultivated in SCD medium fed with 1 mM IBA or IVA at 30 °C. The fluorescence was measured accordingly.

Supplementary Figure 3

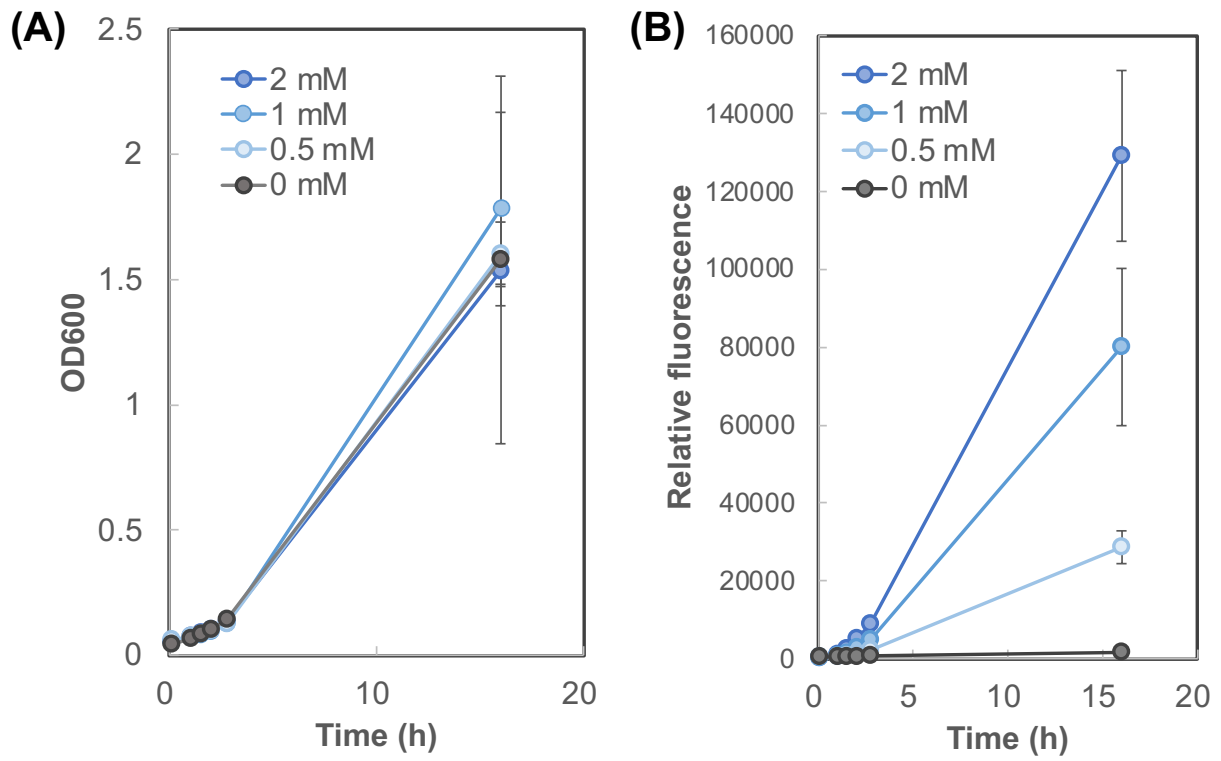

**Supplementary Figure 3.** Time-course cell density (A) and relative fluorescence (B) of BY4741-S<sub>LCA</sub> cells in response to IBA supplied into the medium. BY4741-S<sub>LCA</sub> cells were incubated in the buffered SCD medium (pH6.5) with IBA supply (at 0.5, 1, and 2 mM).

Supplementary Figure 4

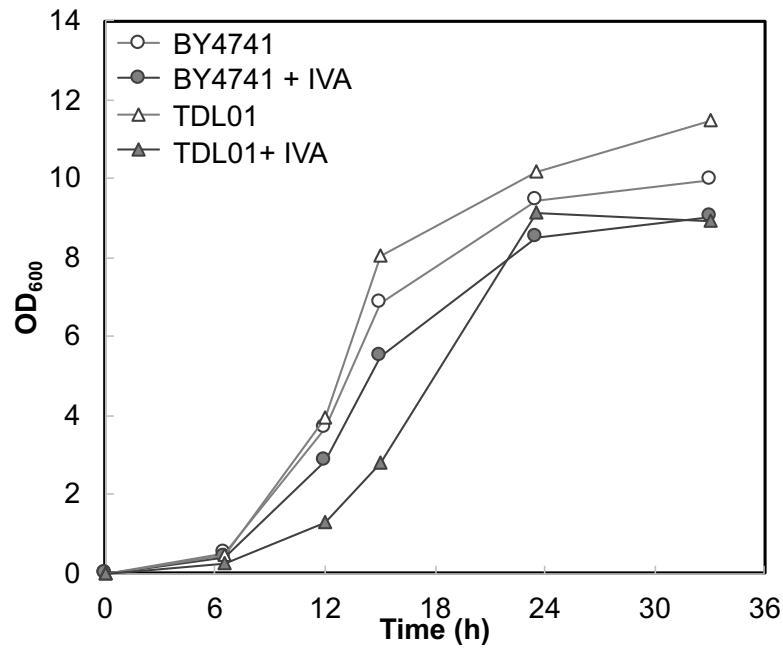

**Supplementary Figure 4.** Growth profiles of TDL01 and BY4741 in the buffered SCD medium (at pH6.5) with and without the supply of 15 mM IVA.

Supplementary Figure 5

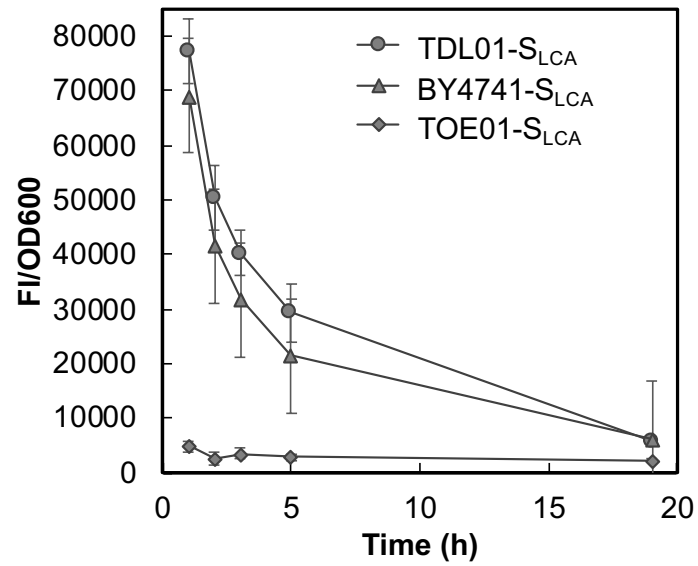

**Supplementary Figure 5.** Time-course background fluorescence of biosensor strains. The strains were cultivated in SCD medium without SBCFA supply. The fluorescence was measured and normalized to their cell density (OD<sub>600</sub>). Values are the means of three independent experiments. An error bar represents a standard deviation of three independent experiments.



Supplementary Figure 6

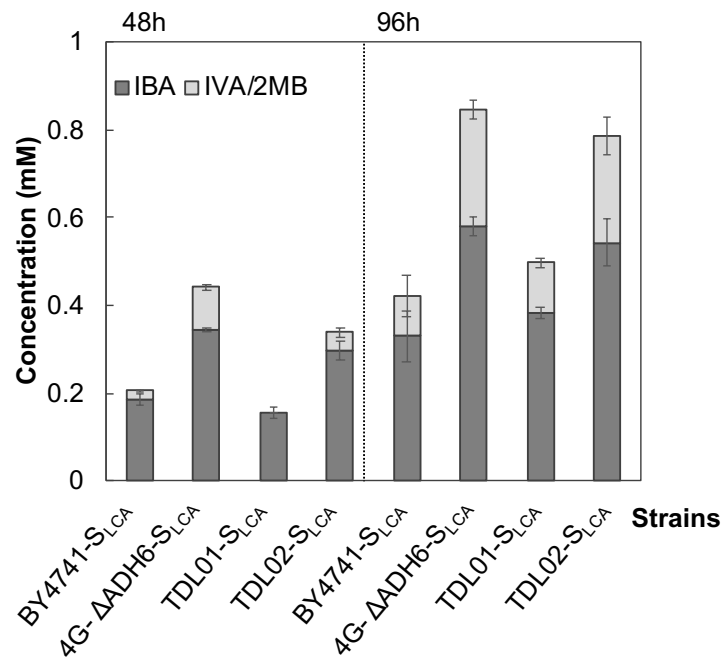

**Supplementary Figure 6.** Composition of SBCFAs in the engineered *S. cerevisiae* producing SBCFA. Values are the means of three independent experiments. An error bar represents a standard deviation of three independent experiments.
